# Supplementary material
Source: PubMed Central journal article supplement (PMC9718039)
Supplement: CJN.03120322SupplementaryData1.pdf [file CJN.03120322SupplementaryData1.pdf]

## Supplemental Material

Supplemental Methods

Supplemental Tables

Supplemental Table 1: Genotype-phenotype correlation in males with digenic Alport syndrome including a *COL4A5* variant

Supplemental Table 2: Genotype-phenotype correlation in females with digenic Alport syndrome including a *COL4A5* variant

Supplemental Table 3: Genotype-phenotype correlation in males and females with digenic Alport syndrome with a *COL4A3* and *COL4A4* variant

## Supplemental Methods

Individuals provided informed consent to the use of their deidentified clinical data at the time of testing or their data in publications or databases were considered to be in the public domain.

Kaplan-Meier plots of kidney survival were constructed as follows.

Males with X-linked Alport syndrome and a pathogenic *COL4A5* variant were identified from LOVD (<https://databases.lovd.nl/shared/genes/COL4A5>) and age at kidney failure extracted. Age at kidney failure was the age at the diagnosis of kidney failure, or where this was not available, the commencement of dialysis, or at first kidney transplant. Affected male family members were included separately. Where only median or mean age at kidney failure was reported for a family, this was used instead. Where a male had not yet progressed to kidney failure, his age at most recent examination was included as a censored data point. Kidney survival curves were compared using the log-rank test.

Survival analysis was performed in R (version 3.6.2) using the *survival* and *survminer* packages <sup>1,2,3</sup>.

## References

1. Therneau T: A Package for survival analysis in R. R package version 3.2-11. <https://CRAN.R-project.org/package=survival>. 2021
2. Therneau TM, Grambsch PM: *Modeling survival data: Extending the Cox model*, New York, Springer, 2000
3. Kassambara A, Kosinski M, Biecek P: *survminer: Drawing survival curves using 'ggplot2'*. R package version 0.4.9. <https://CRAN.R-project.org/package=survminer>. 2021

Supplemental Table 1: Genotype-phenotype correlation in males with digenic Alport syndrome including a *COL4A5* variant

| Ref                  | Person ID        | M/F age | COL4A5 variant                                                  | 2 <sup>nd</sup> variant COL4A3                               | 2 <sup>nd</sup> variant COL4A4 | Haematuria | Proteinuria          | eGFR now | Age at KF | GBM                                                   | Hearing loss         | Eye features                          |
|----------------------|------------------|---------|-----------------------------------------------------------------|--------------------------------------------------------------|--------------------------------|------------|----------------------|----------|-----------|-------------------------------------------------------|----------------------|---------------------------------------|
| Li Zhang 2020        | P13              | M, 5    | c.448G>C,<br>p.Gly150Arg                                        | c.4793T>G,<br>p.Leu1598Arg                                   |                                | YES        | ?                    | ?        | Not yet   | Atypical GBM                                          | NO                   | NO                                    |
| Zhang 2019           | 1                | M, 11   | c.3328_3329<br>insCAAACCCAG,<br>p.Gly1110Alafs*45               | c.4207G>A,<br>p.Gly1403Arg                                   |                                | YES        | 24hr = 3.08<br>g/day | 133      | Not yet   | Thinning,<br>thickened,<br>splitting,<br>basket weave | YES (from 6<br>yrs)  | ?                                     |
| Zhang 2019           | 2                | M, 14   | Exon42del                                                       | c.3946G>A,<br>p.Gly1316Ser                                   |                                | YES        | 24hr = 3.65<br>g/day | 190      | Not yet   | ?                                                     | YES (from<br>14 yrs) | ?                                     |
| Zhang 2019           | 3                | M, 16   | c.1780G>C,<br>p.Gly594Arg                                       |                                                              | c.4915G>C,<br>p.Gly1639Arg     | YES        | 24hr = 1.63<br>g/day | 145      | Not yet   | ?                                                     | ?                    | ?                                     |
| Marina Aksenova      | IM               | M, 16   | c.1871G>A,<br>p.Gly624Asp                                       | c.1219G>C,<br>p.Gly407Arg                                    |                                | YES        | 0.205<br>g/m2/day    | 76       | Not yet   | AS (14 yrs)                                           | NO                   | ?                                     |
| Marina Aksenova      | KG               | M, 18   | c.2605G>A,<br>p.Gly869Arg                                       | c.1992delT,<br>p.Gly665Alafs*82                              |                                | YES        | 0.755<br>g/m2/day    | 70       | Not yet   | FSGS, AS<br>(15 yrs)                                  | 1 gr                 | ?                                     |
| Marina Aksenova      | TD               | M, 17   | c.3293G>A,<br>p.Gly1098Asp                                      |                                                              | c.2996G>A,<br>p.Gly999Glu      | YES        | 0.52<br>g/m2/day     | 112      | Not yet   | AS (14 yrs)                                           | NO                   | ?                                     |
| Marina Aksenova      | ShC              | M, 17   | c.(546+1_610-<br>1)_(780+1_781-1)del                            | c.838G>A,<br>p.Gly280Arg                                     |                                | YES        | 1.082<br>g/m2/day    | 85       | Not yet   | AS (13 yrs)                                           | 1 gr                 | ?                                     |
| Domingo-Gallego 2021 | P228             | M, ?    | c.1643G>A,<br>p.Gly548Asp                                       | c.4649T>G,<br>p.Val1550Gly                                   |                                | YES        | YES                  | ?        | 29        | FSGS                                                  | ?                    | ?                                     |
| Domingo-Gallego 2021 | P230             | M, ?    | c.465+2T>G                                                      | c.2390C>T,<br>p.Pro797Leu                                    |                                | ?          | ?                    | ?        | 23        | Renal cysts                                           | YES                  | Myopia,<br>astigmatism,<br>strabismus |
| Mencarelli 2015      | Family 10 (II:1) | M, 26   | c.4042G>A,<br>p.Gly1348Arg                                      |                                                              | c.2164G>A,<br>p.Gly722Ser      | YES        | YES                  | ?        | Not yet   | ?                                                     | NO                   | NO                                    |
| Mencarelli 2015      | Family 11 (I:2)  | M, 33   | c.2051G>T,<br>p.Gly684Val                                       |                                                              | c.4760C>G,<br>p.Pro1587Arg     | ?          | ?                    | ?        | 25        | ?                                                     | YES                  | YES                                   |
| Mira Choi 2019       | Ild              | M, 55   | c.1871G>A,<br>p.Gly624Asp                                       | c.4484A>G<br>p.Gln1495Arg                                    |                                | YES        | YES (from<br>10 yrs) | ?        | 47        | Global foot<br>process<br>effacement                  | YES                  | YES                                   |
| Suman Sethi 2019     | Proband          | M, 24   | 5' splice mutation in<br>intron 10 (affecting GT<br>donor site) | indel in ex45<br>leading to a<br>stop codon at<br>codon 1331 |                                | YES        | 7.8 mg/dL            | ?        | 24        | ?                                                     | YES                  | Lenticonus                            |

Supplemental Table 2: Genotype-phenotype correlation in females with digenic Alport syndrome including a *COL4A5* variant

| Ref              | Person ID        | M/F age | COL4A5 variant                        | 2 <sup>nd</sup> variant COL4A3      | 2 <sup>nd</sup> variant COL4A4               | Haematuria | Proteinuria                                                                                                    | eGFR now | Age at KF | GBM                    | Hearing loss      | Eye features |
|------------------|------------------|---------|---------------------------------------|-------------------------------------|----------------------------------------------|------------|----------------------------------------------------------------------------------------------------------------|----------|-----------|------------------------|-------------------|--------------|
| Fallerini 2017   | Family 3 (II:1)  | F, 9    | c.2605G>A, p.Gly869Arg                | c.3829G>A, p.Gly1277Ser             |                                              | YES        | YES (from 8 yrs)                                                                                               | ?        | Not yet   | Thinning, splitting    | NO                | NO           |
| Zhao 2019        | IID-27           | F, 37   | c.1339+3A>T                           |                                     | c.4421C>T, p.Thr1474Met                      | YES        | U-P/Cr (g/g) = 1.12                                                                                            | 79       | Not yet   | basket weave           | NO                | NO           |
| Mastrangelo 2020 | Group 2/12       | F, 29   | c.4793_4798delinsTT, p.Ser1598Phefs*2 | c.2765G>T, p.Gly922Glu              |                                              | YES        | Onset uPr/uCr (mg/mg) = 0.4 (age 24 yrs) (peak uPr/uCr = 0.8, age 27 yrs) (current uPr/uCr = 0.17, age 29 yrs) | 120      | Not yet   | ?                      | NO                | NO           |
| Mastrangelo 2020 | Group 2/13       | F, 42   | c.2015G>A.p.Gly672Asp                 | c.5012_5013delGinsTT, *1671Pheext*2 |                                              | YES        | Onset uPr/uCr (mg/mg) = 1.2 (age 22 yrs) (peak uPr/uCr = 5.6, age unknown)                                     | 8        | 40        | ?                      | YES (from 18 yrs) | NO           |
| Zhang 2019       | 4                | F, 3    | c.50delT, p.Leu17Argfs*27             | c.4664C>T, p.Ala1555Val             | c.2932G>A, p.Gly978Arg                       | YES        | uPr/uCr (g/g) = 0.32                                                                                           | ?        | Not yet   | Thinning and splitting | ?                 | ?            |
| Zhang 2019       | 5                | F, 4    | c.3094_3095delAT, p.Met1032Glyfs*35   | c.2549G>A, p.Gly850Glu              |                                              | YES        | 24hr urinary protein (g/d) = 0.12                                                                              | ?        | Not yet   | ?                      | ?                 | ?            |
| Zhang 2019       | 6                | F, 8    | c.4511-2A>G                           |                                     | c.3826G>A, p.Gly1276Arg                      | YES        | 24hr urinary protein (g/d) = 0.207                                                                             | ?        | Not yet   | Thinning, thickening   | ?                 | ?            |
| Marina Aksenova  | AF               | F, 9    | c.1624G>A, p.Gly542Arg                | c.1216C>T, p.Arg406*                |                                              | YES        | 0.25 g/m2/day                                                                                                  | 120      | Not yet   | ?                      | NO                | ?            |
| Marina Aksenova  | GA               | F, 3    | c.680G>C, p.Gly227Ala                 | c.4484A>G, p.Gln1495Arg             |                                              | YES        | NO (0.017 g/m2/day)                                                                                            | 108      | Not yet   | ?                      | NO                | ?            |
| Marina Aksenova  | KV               | F, 6    | c.4291G>A, p.Asp1431Asn               | c.4523A>G, p.Asn1508Ser             |                                              | YES        | 0.115 g/m2/day                                                                                                 | 110      | Not yet   | ?                      | NO                | ?            |
| Mencarelli 2015  | Family 8 (I:1)   | F, 54   | c.2858G>T, p.Gly953Val                |                                     | c.3817+1G>T                                  | ?          | ?                                                                                                              | ?        | 44        | ?                      | YES               | YES          |
| Mencarelli 2015  | Family 9 (II:1)  | F, 45   | c.1931G>A, p.Gly644Asp                |                                     | c.2075G>T, p.Gly692Val                       | YES        | YES                                                                                                            | ?        | Not yet   | ?                      | YES (from 34 yrs) | ?            |
| Mencarelli 2015  | Family 11 (II:4) | F, 13   | c.2051G>T, p.Gly684Val                |                                     | c.1623+5G>T; c.4760C>G, p.?.; p.(Pro1587Arg) | YES        | YES                                                                                                            | ?        | Not yet   | ?                      | NO                | ?            |

|                 |                  |       |                            |                            |                            |     |                                  |        |         |                              |    |                        |
|-----------------|------------------|-------|----------------------------|----------------------------|----------------------------|-----|----------------------------------|--------|---------|------------------------------|----|------------------------|
| Mencarelli 2015 | Family 11 (II:3) | F, 14 | c.2051G>T,<br>p.Gly684Val  |                            | c.1623+5G>T                | YES | YES                              | ?      | Not yet | ?                            | NO | ?                      |
| Mencarelli 2015 | Family 11 (II:5) | F, 9  | c.2051G>T,<br>p.Gly684Val  |                            | c.1623+5G>T                | YES | YES                              | ?      | Not yet | ?                            | NO | ?                      |
| Mencarelli 2015 | Family 11 (II:6) | F, 5  | c.2051G>T,<br>p.Gly684Val  |                            | c.1623+5G>T                | YES | ?                                | ?      | Not yet | ?                            | NO | ?                      |
| Yokota 2017     | Case 2           | F, 11 | c.2732G>A,<br>p.Gly911Glu  | c.3691G>A,<br>p.Gly1231Ser |                            | YES | uPr/uCr (g/g) = 1.0<br>(@11 yrs) | Normal |         | Thinning,<br>basket<br>weave | ?  | ?                      |
| Daga 2018       | 1108/17<br>ats   | F, 55 | c.4689-30_4689-<br>11      |                            | c.592C>T,<br>p.Pro198Ser   | YES | NO                               | ?      | Not yet | ?                            | NO | NO                     |
| Mira Choi 2019  | Ila              | F, ?  | c.1871G>A,<br>p.Gly624Asp  | c.4484A>G,<br>p.Gln1495Arg |                            | YES | 1.5 g/g creatinine               | ?      | Not yet | ?                            | NO | NO                     |
| Mira Choi 2019  | IIf              | F, ?  | c.1871G>A,<br>p.Gly624Asp  | c.4484A>G,<br>p.Gln1495Arg |                            | YES | NO                               | ?      | Not yet | ?                            | NO | NO                     |
| Mira Choi 2019  | IIIb             | F, 37 | c.1871G>A,<br>p.Gly624Asp  | c.4484A>G,<br>p.Gln1495Arg |                            | YES | NO                               | ?      | Not yet | ?                            | NO | NO                     |
| Mira Choi 2019  | IIIc             | F, 30 | c.1871G>A,<br>p.Gly624Asp  | c.4484A>G,<br>p.Gln1495Arg |                            | YES | YES                              | ?      | Not yet | ?                            | NO | NO                     |
| Mira Choi 2019  | IIIg             | F, ?  | c.1871G>A,<br>p.Gly624Asp  | c.4484A>G,<br>p.Gln1495Arg |                            | YES | 1.7 g/g creatinine               | ?      | Not yet | FSGS                         | NO | NO                     |
| Kyoung Han 2019 | Case 1           | F, 11 | c.4688G>A,<br>p.Arg1563Gln |                            | c.4817G>A,<br>p.Gly1606Glu | YES | Total protein = 7.1<br>g/dL      | ?      | Not yet | Thickening                   | NO | Corneal<br>astigmatism |

Supplemental Table 3: Genotype-phenotype correlation in males and females with digenic Alport syndrome with a *COL4A3* and *COL4A4* variant



| Ref              | ID             | M/F age                  | COL4A3 variant          | COL4A4 variant                  | Proteinuria | eGFR now | Age at kidney failure | GBM          | Hearing loss | Eye features |
|------------------|----------------|--------------------------|-------------------------|---------------------------------|-------------|----------|-----------------------|--------------|--------------|--------------|
| Rungsung, 2020   |                | Girl, 18 mo              | c.4145G>T, p.G1382V     | c.2956C>T, p.Pro986Ser          |             |          | 1.5                   |              |              |              |
| Fallerini, 2017  | Family 1       | Proband iii:1            | c.3829G>A, p.G1277S     | c.931-2A>G                      | YES         |          | 52 years              | Basket-weave | NO           | NO           |
| Fallerini, 2017  |                | Son IV.1, 28 yrs         | c.3829G>A, p.G1277S     | c.931-2A>G                      | NO          |          |                       |              |              |              |
| Fallerini, 2017  |                | son IV.3, 21 yrs         | c.3829G>A, p.G1277S     | c.931-2A>G                      | NO          |          |                       |              |              |              |
| Fallerini, 2017  | Family 2, II-2 | M, 37 yrs                | c.3829G>A, p.G1277S     | c.3697G>A, p.Gly1233Ser         | YES         |          | 34 yrs                |              | NO           | NO           |
| Fallerini, 2017  |                | Mother 1.1. F, 66yrs     | c.3829G>A, p.G1277S     | c.3697G>A, p.Gly1233Ser         |             |          | ? Before 66 yrs       |              | YES, 47 yrs  |              |
| Fallerini, 2017  | Family 4       | Proband , II.1, F 49 yrs | c.4523A>G, p.Asn1508Ser | c.5045G>A                       | YES         |          | 49 yrs                | Thinned      |              |              |
| Mencarelli, 2015 | Family 1       | Proband II-2, M7         | c.2746+1G>T             | c.1553G>A                       | NO          |          |                       |              | NO           | NO           |
| Mencarelli, 2015 | Family 2       | Proband II.1, F 36 yrs   | c.898G>A, p.Gly300Arg   | c.3452G>C                       | NO          |          |                       |              | NO           | NO           |
| Mencarelli, 2015 | Family 3       | Proband 1.2, M55yrs      | c.1558G>C, p.Gly520Arg  | c.4698delT                      | YES         |          | 55 yrs                |              | YES          | NO           |
| Mencarelli, 2015 |                | Sister 1.1, F 60 yrs     | c.1558G>C, p.Gly520Arg  | c.4698delT                      | NO          |          | 50 yrs                |              | YES          | NO           |
| Mencarelli, 2015 | Family 4       | Proband III.1, F 36 yrs  | c.1504+1G>A             | c.1293_131del                   | YES         |          | Not yet               |              | NO           |              |
| Mencarelli, 2015 | Family 5       | Proband ii.1, F 3yrs     | c.2065G>A, p.Gly689Arg  | c.1459+1G>A                     | NO          |          | Not yet               |              | NO           | NO           |
| Mencarelli, 2015 | Family 6       | Proband II.1, F 37 yrs   | c.4994G>A, p.Cys1665Tyr | c.2906C>G                       | YES         |          |                       |              |              |              |
| Mencarelli, 2015 | Family 7       | Proband II.1, M45 yrs    | del exon 1              | c(1-?_192+?del);(=)(delex 1 -4) | ?           |          | < 45 years            |              |              |              |

|                 |                     |            |                                    |                                      |       |             |         |         |    |
|-----------------|---------------------|------------|------------------------------------|--------------------------------------|-------|-------------|---------|---------|----|
| Kamiyoshi, 2016 | Patient 122         | M, 35      | c.4217G>A,<br>p.G1406Glu           | c.2869G>A                            | 0.45  | eGFR<br>=54 | Not yet |         |    |
| Kamiyoshi, 2016 | Patient 140         | M, 16      | c.4217G>A,<br>p.Gly1406Glu         | c.2869G>A                            | 0.92  | eGFR<br>=80 | Not yet |         |    |
| Furlano 2021    | Family 32-19-0527   | M, 49      | c.345del,<br>p.Pro116Leufs*37      | c.1100dup                            | YES   | eGFR<br>=47 | Not yet |         |    |
| Furlano 2021    | Family 32-190526    | F, 59      | c.345del,<br>p.Pro116Leufs*37      | c.1100dup                            | YES   | 10          | 59      |         |    |
| Furlano 2021    | family 32 - 19-0529 | F, 30      | c.345del,<br>p.Pro116Leufs*37      | c.1100dup,<br>p.Pro369Thrfs*61       | NO    | eGFR<br>=98 | Not yet |         |    |
| Furlano 2021    | Family 115-07-66    | F, 58      | c.4826G>A,<br>p.Arg1609Gln         | c.4351G>A,<br>p.Gly1451Arg           | NO    | 80          | Not yet |         | NO |
| Furlano 2021    | Family 115-15-487   | M, 42      | c.4826G>A,<br>p.Arg1609Gln         | c.4351G>A,<br>p.Gly1451Arg           | YES   | 82          | Not yet |         |    |
| Furlano 2021    | Family 115-18-129   | F, 37      | c.4826G>A,<br>p.Arg1609Gln         | c.4351G>A,<br>p.Gly1451Arg           | NO    | 85          | Not yet |         |    |
| Furlano 2021    | Family 252-15-527   | F, 49      | c.2342_2350,<br>p.Thr781_Gly783del | c.5045G>A,<br>p.Arg1682Gln           | YES   | 98          | Not yet |         | NO |
| Furlano 2021    | Family 252-16-717   | F, 54      | c.2342_2350,<br>p.Thr781_Gly783del | c.5045G>A,<br>p.Arg1682Gln           | NO    |             |         |         |    |
| Furlano 2021    | Family 252-16-265   | M, 54      | c.2342_2350,<br>p.Thr781_Gly783del | c.5045G>A,<br>p.Arg1682Gln           | YES   | 10          | 54      |         | NO |
| Furlano 2021    | Family 300-17-072   | M, 8       | c.3829G>A,<br>p.Gly1277Ser         | c.193G>A,<br>p.Gly65Ser              | YES   | 109         | Not yet |         | NO |
| Furlano 2021    | Family 336 - 17-515 | F, 43      | c.3302G>A,<br>p.Gly1101Glu         | c.4449_4450dup,<br>p.Met1484Thrfs*69 | YES   |             | Not yet |         |    |
| Furlano 2021    | Family 999          | F, 44      | del2q36.3                          | dup2q13                              | YES   | 74          |         |         | NO |
| Zhao            | II-D29              | m,5        | c.3356G>A,<br>p.Gly1119Asp         | c.5026C>T,<br>p.Gln1676Ter           | 0.376 | 74          |         | Thinned |    |
| Ars             | P194                | M, 8 years | c.3829G>A,<br>p.Gly1277Ser         | c.193G>A,<br>p.Gly65Ser              | YES   |             |         |         |    |
| Ars             | P205                | F, unknown | c.4826G>A,<br>p.Arg1609Gln         | c.2908C>T,<br>p.Gln970*              |       | <60         |         | FSGS    |    |
